# Supplementary material
Source: PubMed Central journal article supplement (PMC3141882)
Supplement: supp_111.038836_supp_materials1.pdf [file supp_111.038836_supp_materials1.pdf]

## **Supplemental Materials**

### **Identification of Cytochrome P450 Oxidoreductase Gene Variants that are Significantly Associated with the Interindividual Variations in Warfarin Maintenance Dose**

Xiuling Zhang, Lei Li, Xinxin Ding, and Laurence S. Kaminsky

*Wadsworth Center, New York State Department of Health, Albany, NY 12201 (XZ, LL, XD),*

*Stratton VA Medical Center, Albany, NY 12208 (LK)*

TABLE S1

**PCR primers used for amplification of target genes**

| SNP                     | Primer name         | Primer sequences (5' to 3') | Size of PCR product |
|-------------------------|---------------------|-----------------------------|---------------------|
| <i>CYP2C9</i> *2        | 2C9In2F2            | gaaaacagagacttacagagctc     | 309 bp              |
|                         | 2C9In3R1            | agtcagtaaggctcagtgatg       |                     |
| <i>CYP2C9</i> *3        | 2C9In6F2            | atgatgtttggataccttcagattc   | 373 bp              |
|                         | 2C9In7R2            | cggtgatggtagaggtttaaaaatg   |                     |
| <i>VKORC1</i> -1639G>A  | VK_-1639_F1         | acagacgccagaggaaga          | 195 bp              |
|                         | VK_-1639_R1         | gttgccaggcttctctta          |                     |
| <i>CYP4F2</i> rs2108622 | rs2108622F          | ccctcagtgaaggagc            | 147 bp              |
|                         | rs2108622R          | ggaatggacaaaacagagagag      |                     |
| <i>STX1B</i> rs4889606  | rs4889606F          | tcggaagatcaccttttctg        | 187 bp              |
|                         | rs4889606R          | tctacaaagtccaggagcc         |                     |
| <i>POR</i> A503V        | <i>POR</i> _A503V_F | tggttgaggagtacgagac         | 127 bp              |
|                         | <i>POR</i> _A503V_R | gacttgccgacgaacat           |                     |
| <i>POR</i> rs10280802   | rs10280802F         | ggtgtgatgatctggaagg         | 148 bp              |
|                         | rs10280802R         | ggctagaaatcagaaatggc        |                     |
| <i>POR</i> rs28737229   | rs28737229F         | ctggagacacatgagacacg        | 254 bp              |
|                         | rs28737229R         | ctaggtcctcctaacatggc        |                     |
| <i>POR</i> rs41301427   | rs41301427F         | tactactccatgcctcatc         | 191 bp              |
|                         | rs41301427R         | gcccgactgagtcac             |                     |
| <i>POR</i> rs1057870    | rs1057870F          | ctcataggcttcatccagg         | 273 bp              |
|                         | rs1057870R          | cccgtctcaccttgg             |                     |
| <i>POR</i> rs17148944   | rs17148944F         | aatcaagtctagcagacggc        | 114 bp              |
|                         | rs17148944R         | cttcagggtcttggttagg         |                     |
| <i>POR</i> rs2868177    | rs2868177F          | cctctgaacagagcatttcg        | 315 bp              |
|                         | rs2868177R          | gttgttcataagggtgagc         |                     |
| <i>POR</i> -173C>A      | <i>POR</i> _-289_F  | cacagttctgcagtgatcc         | 384 bp              |
|                         | <i>POR</i> _+95_R   | cgaaagatagcactcaccg         |                     |
| <i>POR</i> -208C>T      | <i>POR</i> _-289_F  | cacagttctgcagtgatcc         | 384 bp              |
|                         | <i>POR</i> _+95_R   | cgaaagatagcactcaccg         |                     |
| <i>POR</i> rs17685      | rs17685F            | taagttgatgcaggtggagg        | 163 bp              |
|                         | rs17685R            | gaagggtcttctctctgc          |                     |

TABLE S2

## Information on ASPE primers and beads

| SNP                        | Primer name         | Primer sequences (5' to 3') <sup>a</sup> | Tm     | Allele detected | Bead region |
|----------------------------|---------------------|------------------------------------------|--------|-----------------|-------------|
| <i>CYP2C9</i> *2           | 2C9E3A2_C           | Tag-gaagaggagcattgaggacc                 | 55.1°C | Reference       | LUA-66      |
|                            | 2C9E3A2_T           | Tag-gaagaggagcattgaggact                 | 54.0°C | Variant         | LUA-28      |
| <i>CYP2C9</i> *3           | 2C9E7A3_A           | Tag-gcacgagggtccagagataca                | 56.2°C | Reference       | LUA-6       |
|                            | 2C9E7A3_C           | Tag-gcacgagggtccagagatacc                | 57.1°C | Variant         | LUA-5       |
| <i>VKORC1</i> -<br>1639G>A | VK_-1639_G          | Tag-ctgaaaaacaaccattggccg                | 55.3°C | Reference       | LUA-33      |
|                            | VK_-1630_A          | Tag-ctgaaaaacaaccattggcca                | 54.4°C | Variant         | LUA-34      |
| <i>CYP4F2</i><br>rs2108622 | rs2108622C          | Tag-ctcagggtccggccacac                   | 61.1°C | Reference       | LUA-49      |
|                            | rs2108622T          | Tag-ctcagggtccggccacat                   | 60.1°C | Variant         | LUA-59      |
| <i>STX1B</i> rs4889606     | rs4889606A          | Tag-ctcctttccctcatttctatca               | 54.0°C | Reference       | LUA-37      |
|                            | rs4889606G          | Tag-ctcctttccctcatttctateg               | 54.8°C | Variant         | LUA-12      |
| <i>POR</i> A503V           | <i>POR</i> _A503V_C | Tag-cgggccaaggagcctgc                    | 62.6°C | Reference       | LUA-77      |
|                            | <i>POR</i> _A503V_T | Tag-cgggccaaggagcctgt                    | 61.0°C | Variant         | LUA-84      |
| <i>POR</i> rs10280802      | rs10280802C         | Tag-gggggaatggacattggc                   | 56.5°C | Reference       | LUA-10      |
|                            | rs10280802T         | Tag-gggggaatggacattggt                   | 54.9°C | Variant         | LUA-100     |
| <i>POR</i> rs28737229      | rs28737229T         | Tag-accctctagcatctatggt                  | 54.6°C | Reference       | LUA-37      |
|                            | rs28737229G         | Tag-accctctagcatctatggg                  | 55.5°C | Variant         | LUA-31      |
| <i>POR</i> rs41301427      | rs41301427G         | Tag-ccctgccagccacacg                     | 60.0°C | Reference       | LUA-18      |
|                            | rs41301427A         | Tag-ccctgccagccacaca                     | 58.6°C | Variant         | LUA-28      |
| <i>POR</i> rs1057870       | rs1057870G          | Tag-ggtacaggtagtctcatcc                  | 53.8°C | Reference       | LUA-1       |
|                            | rs1057870A          | Tag-ggtacaggtagtctcatct                  | 52.6°C | Variant         | LUA-35      |
| <i>POR</i> rs17148944      | rs17148944G         | Tag-accgggacatcctctatgc                  | 56.6°C | Reference       | LUA-31      |
|                            | rs17148944A         | Tag-accgggacatcctctatgt                  | 55.0°C | Variant         | LUA-37      |
| <i>POR</i> rs2868177       | rs2868177A          | Tag-gccttgcaaagtctgagatca                | 55.6°C | Reference       | LUA-50      |
|                            | rs2868177G          | Tag-gccttgcaaagtctgagatcg                | 56.5°C | Variant         | LUA-88      |
| <i>POR</i> -173C>A         | <i>POR</i> _ -173_C | Tag-cccggcagagaaatgaaagtg                | 56.3°C | Reference       | LUA-77      |
|                            | <i>POR</i> _ -173_A | Tag-cccggcagagaaatgaaagt                 | 55.6°C | Variant         | LUA-5       |
| <i>POR</i> -208C>T         | <i>POR</i> _ -208_C | Tag-ggagtcgcctggagacg                    | 58.0°C | Reference       | LUA-86      |
|                            | <i>POR</i> _ -208_T | Tag-ggagtcgcctggagaca                    | 56.7°C | Variant         | LUA-8       |
| <i>POR</i> rs17685         | rs17685C            | Tag-gcccagcccctccacg                     | 62.5°C | Reference       | LUA-18      |
|                            | rs17685T            | Tag-gcccagcccctccaca                     | 61.2°C | Variant         | LUA-10      |

<sup>a</sup>The last nucleotide of each primer corresponds to the SNP site (either sense or antisense strand).
